# Supplementary material for: Three-dimensional flower-like NiCo2O4/CNT for efficient catalysis of the oxygen evolution reaction
Source: PubMed Central journal article supplement — RSC Adv. 2018 Aug 7;8(49):28209–15. doi: 10.1039/c8ra05639k (PMC9084419; doi:10.1039/c8ra05639k), 2018-08-07
Supplement: RA-008-C8RA05639K-s001.pdf [file RA-008-C8RA05639K-s001.pdf]

## Supporting Information

### Three-dimensional Flower-like NiCo<sub>2</sub>O<sub>4</sub>/CNT for Efficient Catalysis of Oxygen Evolution Reaction

Zhaoling Ma<sup>a</sup>, Hao Fu<sup>a</sup>, Cibing Gu<sup>a</sup>, Youguo Huang<sup>a\*</sup>, Sijiang Hu<sup>b</sup>, Qingyu Li<sup>a</sup>,  
Hongqiang Wang<sup>a,b,\*</sup>

<sup>a</sup> Guangxi Key Laboratory of Low Carbon Energy Materials, School of Chemistry and  
Pharmaceutical Sciences, Guangxi Normal University, Guilin, 541004, China.

<sup>b</sup> Hubei Key Laboratory for Processing and Application of Catalytic Materials,  
College of Chemical Engineering, Huanggang Normal University, Huanggang,  
438000, China.

Corresponding authors

E-mail addresses:

\* Hong-Qiang Wang, whq74@126.com, whq74@mailbox.gxnu.edu.cn

Fax: +86-0773-5858562

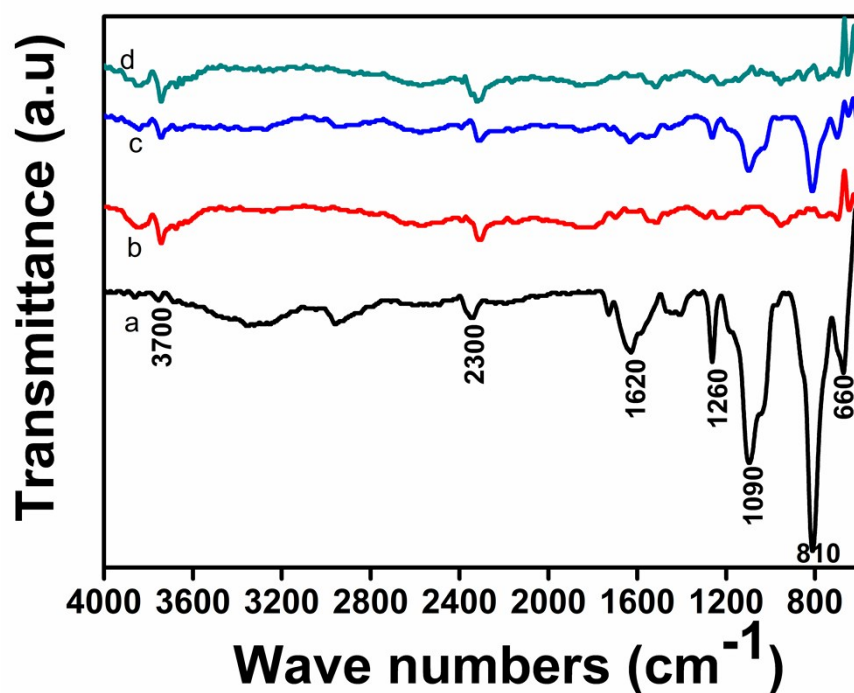

**Figure S1.** FTIR spectra of CNT (a), NiCo<sub>2</sub>O<sub>4</sub>/CNT (b), NiCo<sub>2</sub>O<sub>4</sub>/CNT -150 (c),  
NiCo<sub>2</sub>O<sub>4</sub>/CNT -250 (d).

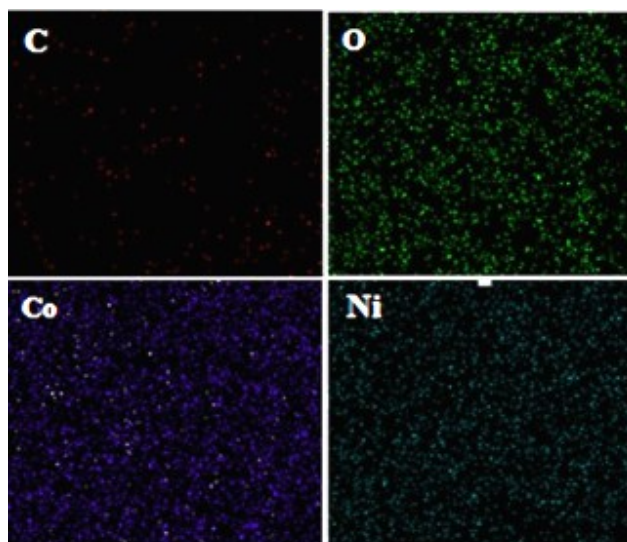

**Figure S2.** The corresponding elemental mappings of C, O, Co and Ni for the NiCo<sub>2</sub>O<sub>4</sub>/CNT -150.

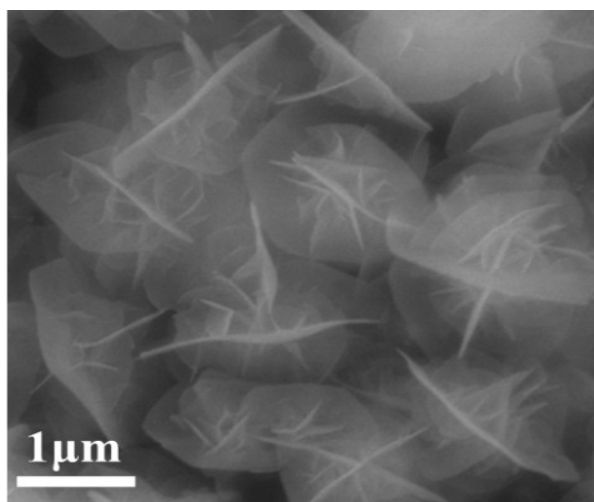

**Figure S3.** SEM of NiCo<sub>2</sub>O<sub>4</sub>/CNT-150 after all the electrochemical characterization.

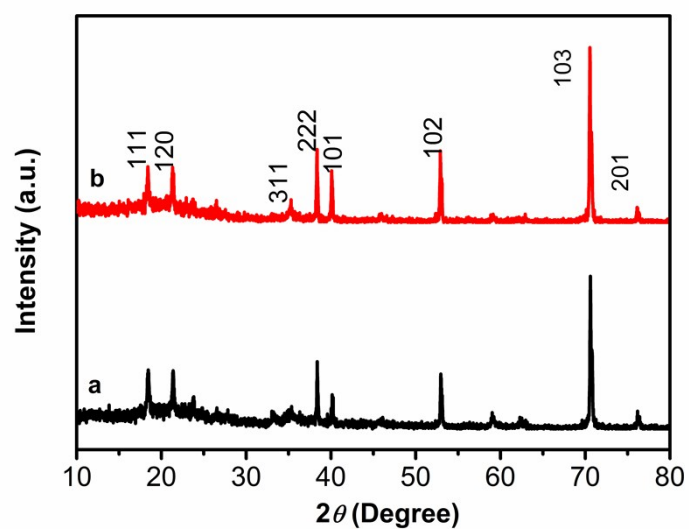

**Figure S4.** XRD spectra of NiCo<sub>2</sub>O<sub>4</sub>/CNT-150 (a) before and (b) after all the electrochemical characterization.

**Table S1. Performances Comparison of NiCo<sub>2</sub>O<sub>4</sub>/CNT -150 catalysts.**

| Catalyst Material                                   | Electrolyte solution | Onset $\eta$ (mV) | $\eta$ (mV) at 10 mA/cm <sup>2</sup> | $\eta$ (mV) at 100 mA/cm <sup>2</sup> | Tafel slope (mV/dec) | Ref.         |
|-----------------------------------------------------|----------------------|-------------------|--------------------------------------|---------------------------------------|----------------------|--------------|
| NiCo <sub>2</sub> O <sub>4</sub> /CNT -150          | 0.1 M KOH            | 300               | 340                                  | 470                                   | 129                  | In this work |
| Au/NiCo <sub>2</sub> O <sub>4</sub>                 | 1 M KOH              | —                 | 360                                  | —                                     | 63                   | [1]          |
| NiCo <sub>2</sub> O <sub>4</sub> NNs                | 1 M KOH              | 365               | —                                    | —                                     | 292                  | [2]          |
| NiCo <sub>2</sub> O <sub>4</sub> NSs                | 1 M KOH              | 415               | —                                    | —                                     | 393                  | [2]          |
| NiCo <sub>2</sub> O <sub>4</sub> /CNTs              | 1 M KOH              | 500               | —                                    | —                                     | 68.1                 | [3]          |
| NiCo <sub>2</sub> O <sub>4</sub> /Graphene          | 0.1M KOH             | 550               | —                                    | —                                     | 164                  | [4]          |
| NiCo <sub>2</sub> O <sub>4</sub> /C                 | 1 M KOH              | —                 | 414                                  | —                                     | 69.4                 | [5]          |
| NiCo <sub>2</sub> O <sub>4</sub> hollow nanospheres | 0.1 M KOH            | 220               | —                                    | —                                     | —                    | [6]          |
| NiCo <sub>2</sub> O <sub>4</sub> /Graphene          | 1 M KOH              | 250               | 313                                  | —                                     | 35                   | [7]          |

## References

- [1] X. Liu, J. Liu, Y. Li, et al., *Chem. Cat. Chem.*, 2014, **6**, 2501-2506.
- [2] H. Shi, G. Zhao, *J. Mater. Chem. C*, 2014, **118**, 25939-25946.
- [3] H. Cheng, Y. Z. Su, P. Y. Kuang, et al., *J. Mater. Chem. A*, 2015, **3**, 19314-19321.
- [4] D. U. Lee, B. J. Kim, Z. Chen, *J. Mater. Chem. A*, 2013, **1**, 4754-4762.
- [5] Z. Zheng, W. Gen, Y. Wang, Y. Huang, T. Qi, *Int. J. Hydr. Energy*, 2017, **42**, 119-124.
- [6] Wang J, Fu Y, Xu Y, et al., *Int. J. Hydr. Energy*, 2016, **41**, 8847-8854.
- [7] Aneeya K. Samantara, Swagatika Kamil, Arnab Ghosh, *Electrochim. Acta*, 2018, **263**, 147-157.
